# Supplementary material for: Insight into the maintenance of odontogenic potential in mouse dental mesenchymal cells based on transcriptomic analysis
Source: PeerJ. 2016 Feb 22;4:e1684. doi: 10.7717/peerj.1684 (PMC4768683; doi:10.7717/peerj.1684)
Supplement: File S1 — The downstream genes regulated by Bdnf, Bmp2, and Bmp7 were listed. [file peerj-04-1684-s005.xls]

## Sheet: Bdnf
Genes regulated by Bdnf predicted by IPA
Dowregulated	Upregulated genes
Fos	Gpc4
FosB	Hspa4l
Glul	Lamb2
Gria1	Lamc1
Gria2	Pdlim5
Homer1	Pltp
Jun	Rnh1
Kif21b	Sparc
Map1b	Tagln
Ngfr	Tnfrsf11b
Nr4a1	Tpp1
Nr4a3	Vim
Nrxn1	Anxa2
Ntrk2	Anxa5
Penk	App
Sorl1	Bid
Sostdc	Flna
Sk1	Flnb
Thra
Ttc3
Trpc3
Vamp2
Zcchc18
Arc
Bcl2
Bmp2
Bmp7
Chn2
Dusp6
Egr1
Egr2

## Sheet: Bmp2
Genes regulated by Bmp2 predicted by IPA
Dowregulated	Upregulated genes
Fosb	F3
Gfra1	Mmp3
Has2	Tagln
Hey1	Tg
Id1	Acta2
Id2	Bmp4
Jun	Ccnd1
Junb
Klf10
Mef2c
Mmo9
Msx2
Myc
Pitx2
Pth1r
Runx2
Sostdc1
Sox6
Sp7
Tbx2
Tgm2
Tnfsf11
Twsg1
Vegfa
Aldh1a2
Bcl2
Col2a1
Dkk1

## Sheet: Bmp7
Genes regulated by Bmp7 predicted by IPA
Dowregulated	Upregulated genes
Epcam	Fn1
Cebpa	Igfbp6
Cd34	Mmp13
Vegfa	S100a4
Sp7	Acta2
Sostdc1	Adora1
Smad5	Bmp4
Runx2	Col1a1
Penk
Msx2
Map3k5
Igfbp3
Id1
Id2
